# Supplementary material
Source: publisher figshare collection journal article supplement (https://acs.figshare.com/ndownloader/files/4522543)
Supplement: Supplementary file 1 [file 4522543]

# Supporting Information

## Lanthanide-Doped Layered Double Hydroxides Intercalated with Sensitizing Anions: Efficient Energy Transfer between Host and Guest Layers

Poernomo Gunawan, and Rong Xu\*

*School of Chemical and Biomedical Engineering, Nanyang Technological University, 62 Nanyang Drive, Singapore 637459*

### Preparation of physical mixture of Tb(III) and NoTb-BPA

Briefly, 5 g of the wet cake of the as-prepared NoTb-BPA LDH sample was dispersed in 20 mL of deionized water by ultrasonication for 30 min. Meanwhile, a solution of terbium (III) chloride hexahydrate ( $\text{TbCl}_3 \cdot 6\text{H}_2\text{O}$ , 99.9%, Sigma-Aldrich) was prepared by dissolving 0.466 g of the salt in 80 mL of deionized water. The initial pH of  $\text{TbCl}_3$  solution was about 4.0 and it was adjusted to neutral by adding three drops of the dilute NaOH solution. The LDH suspension was then mixed with  $\text{TbCl}_3$  solution and the mixture was stirred at 70 °C for 24 h under nitrogen protection. The resulting suspension was centrifuged and the precipitate was dried in oven at 60 °C.

**Table S1.** Compositions of zeolite samples doped with  $\text{Tb}^{3+}$ .

| Sample    | %Tb (wt%) <sup>a</sup> | %C (wt%) <sup>b</sup> | %N (wt%) <sup>b</sup> | %BPA (wt%) <sup>c</sup> |
|-----------|------------------------|-----------------------|-----------------------|-------------------------|
| ZY-Tb     | 20.0                   | 0.0                   | 0.05                  | -                       |
| ZY-Tb-BPA | 21.1                   | 3.3                   | 0.09                  | 4.15                    |

<sup>a</sup>The weight percentage of Al and Tb obtained from EDS.

<sup>b</sup>The weight percentage of C and N obtained from CHN elemental analysis.

<sup>c</sup>The weight percentage of BPA obtained from UV-vis analysis.

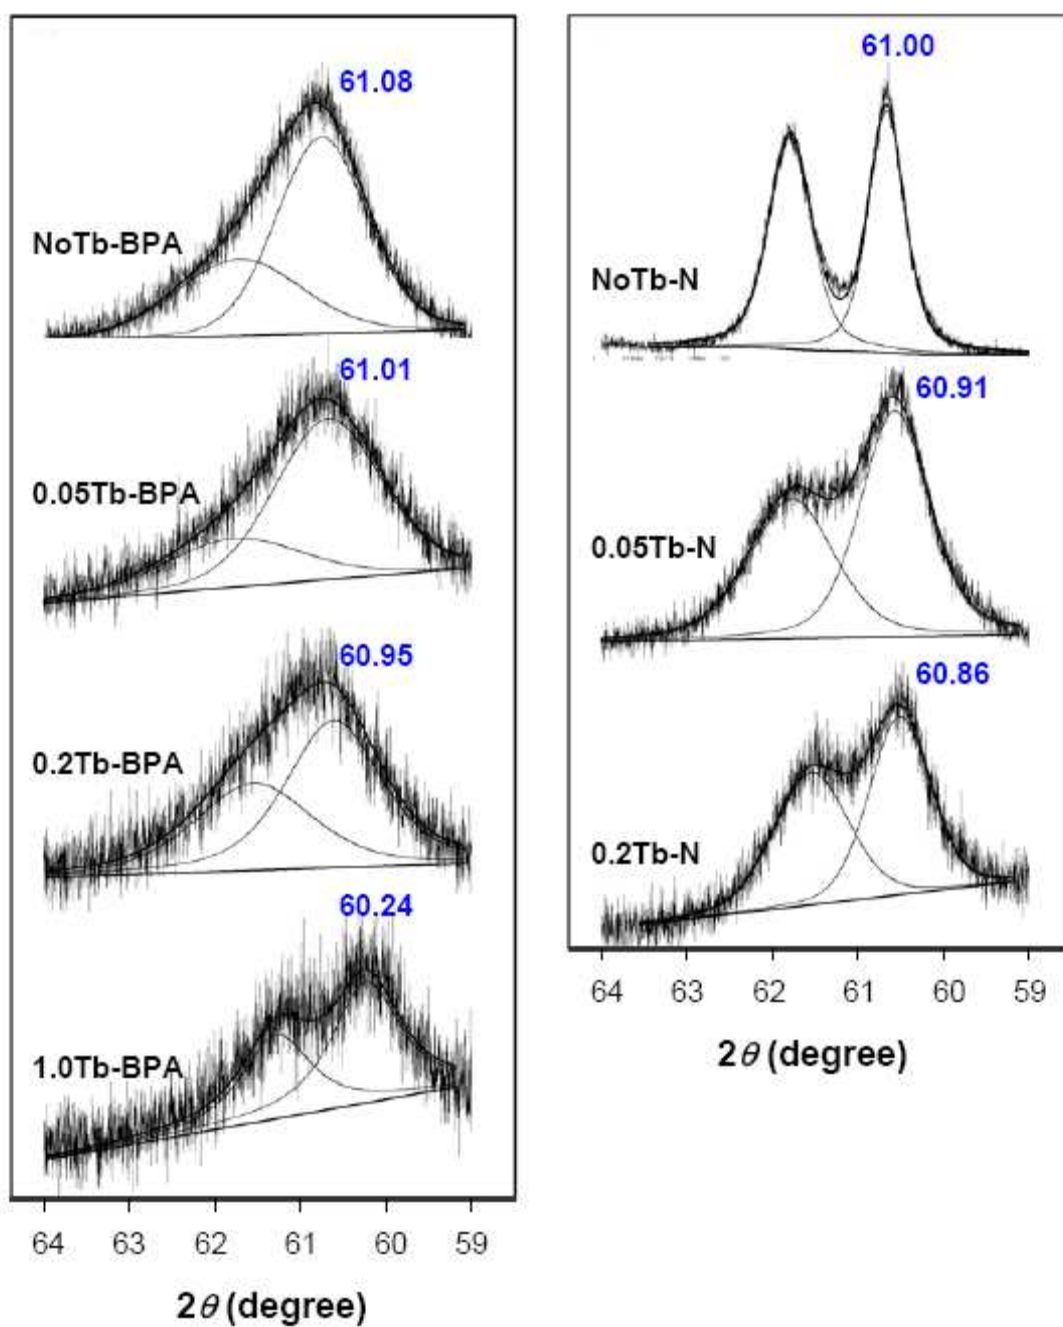

**Figure S1.** Deconvolution of (110) and (113) peaks for XRD patterns of LDH samples. The positions of (110) peaks are indicated on the curves.

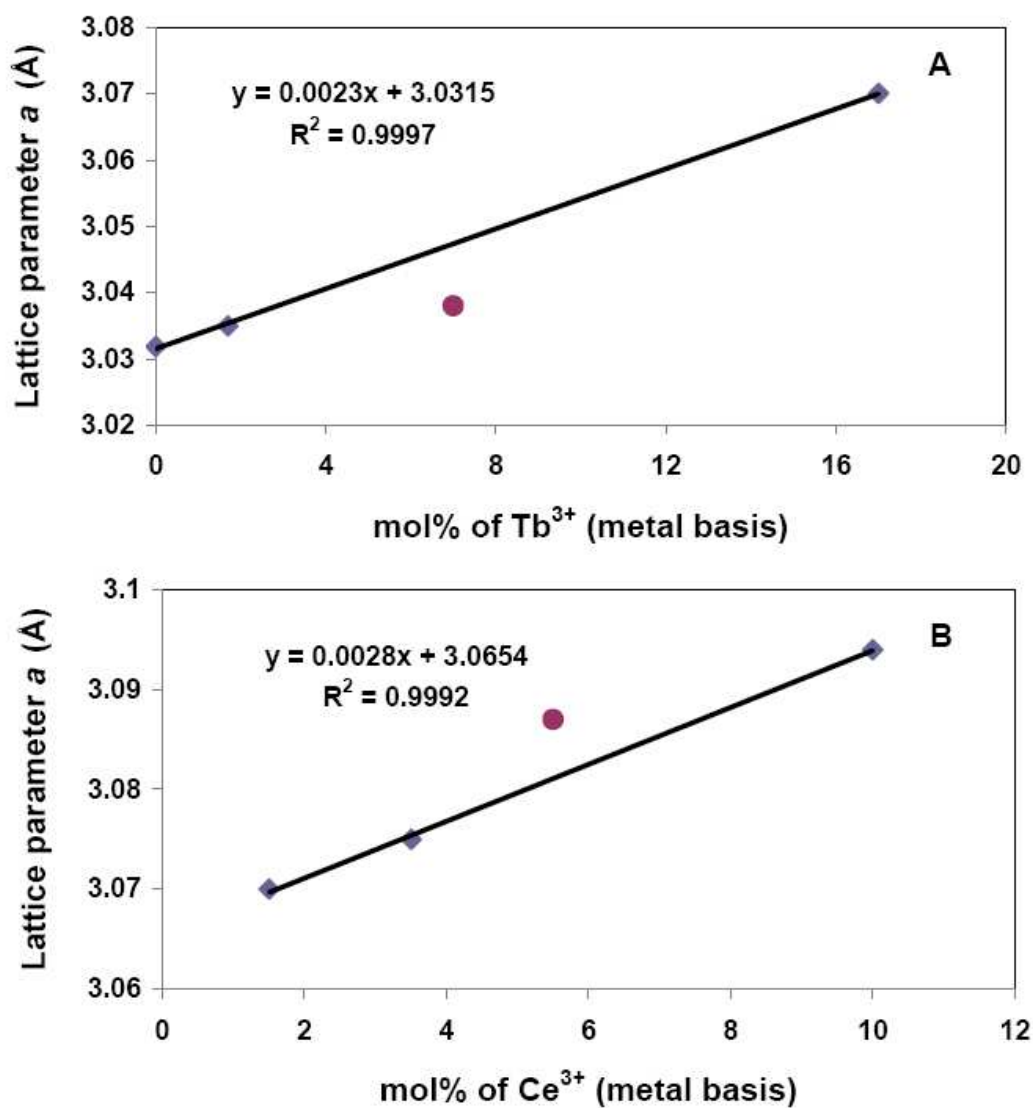

**Figure S2.** Lattice parameter  $a$  versus molar percentage of (A)  $Tb^{3+}$  ions in BPA intercalated LDH samples synthesized in this work, and (B)  $Ce^{3+}$  ions in LDH samples reported by Das et al.<sup>1</sup>

Reference:

[1] Das, J.; Das, D.; Parida, K. M., *J. Colloid Interf. Sci.* **2006**, 301, 569.

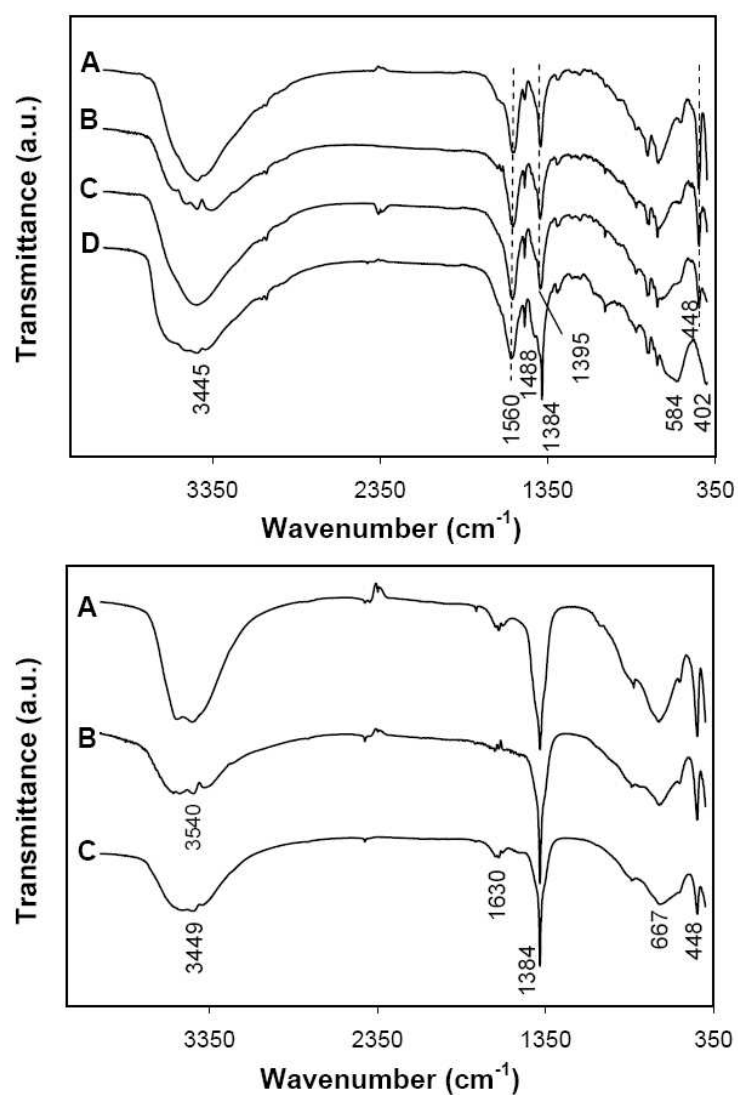

**Figure S3.** FTIR spectra of samples (A) NoTb-BPA, (B) 0.05Tb-BPA, (C) 0.2Tb-BPA, and (D) 1.0Tb-BPA in the upper part; (A) NoTb-N, (B) 0.05Tb-N, and (C) 0.2Tb-N in the lower part.

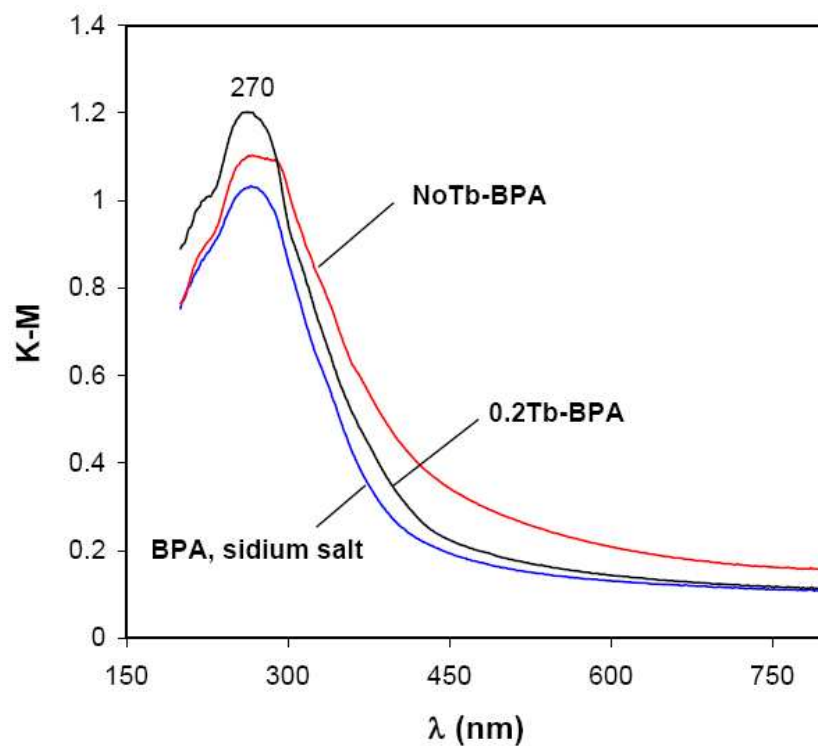

**Figure S4.** UV-vis diffuse reflectance spectra of samples NoTb-BPA, 0.2Tb-BPA and sodium salt of BPA.

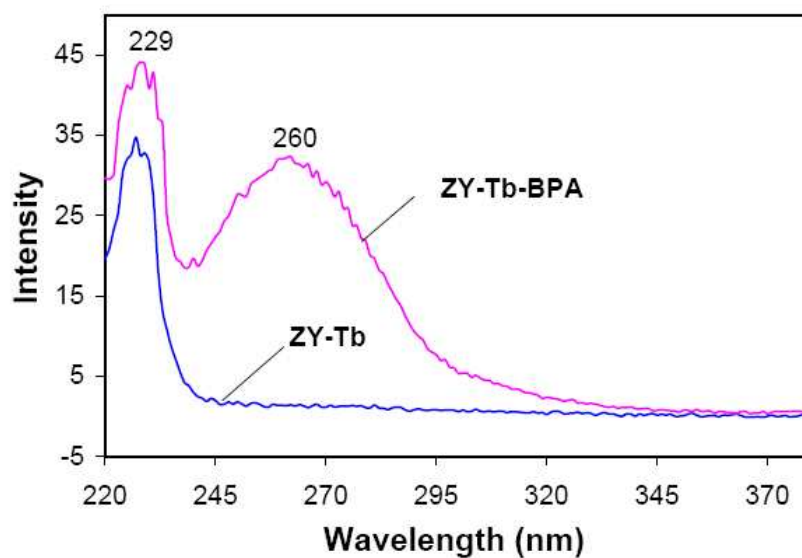

**Figure S5.** Excitation spectra ( $\lambda_{em} = 542$  nm) of  $Tb^{3+}$ -doped zeolite samples with (ZY-Tb-BPA) or without BPA (ZY-Tb).
